# Supplementary material for: New supercharging reagents produce highly charged protein ions in native mass spectrometry
Source: Royal Society of Chemistry journal article supplement (doi:10.1039/c5an01710f), 2015-01-01
Supplement: c5an01710f1.pdf [file c5an01710f1.pdf]

# **New Supercharging Reagents Produce Highly Charged Protein Ions in Native Mass Spectrometry**

Catherine C. Going, Zijie Xia, and Evan R. Williams\*

## **Supporting Information**

Department of Chemistry, University of California, Berkeley, California 94720-1460

\*Address communication to Prof. Evan R. Williams: [erw@berkeley.edu](mailto:erw@berkeley.edu)

## Table of Contents

|                                                                              |     |
|------------------------------------------------------------------------------|-----|
| Figure S-1. Effect of HD concentration on cytochrome <i>c</i> charging ..... | S-3 |
| Figure S-2. Supercharging on Q-TOF instrument .....                          | S-4 |

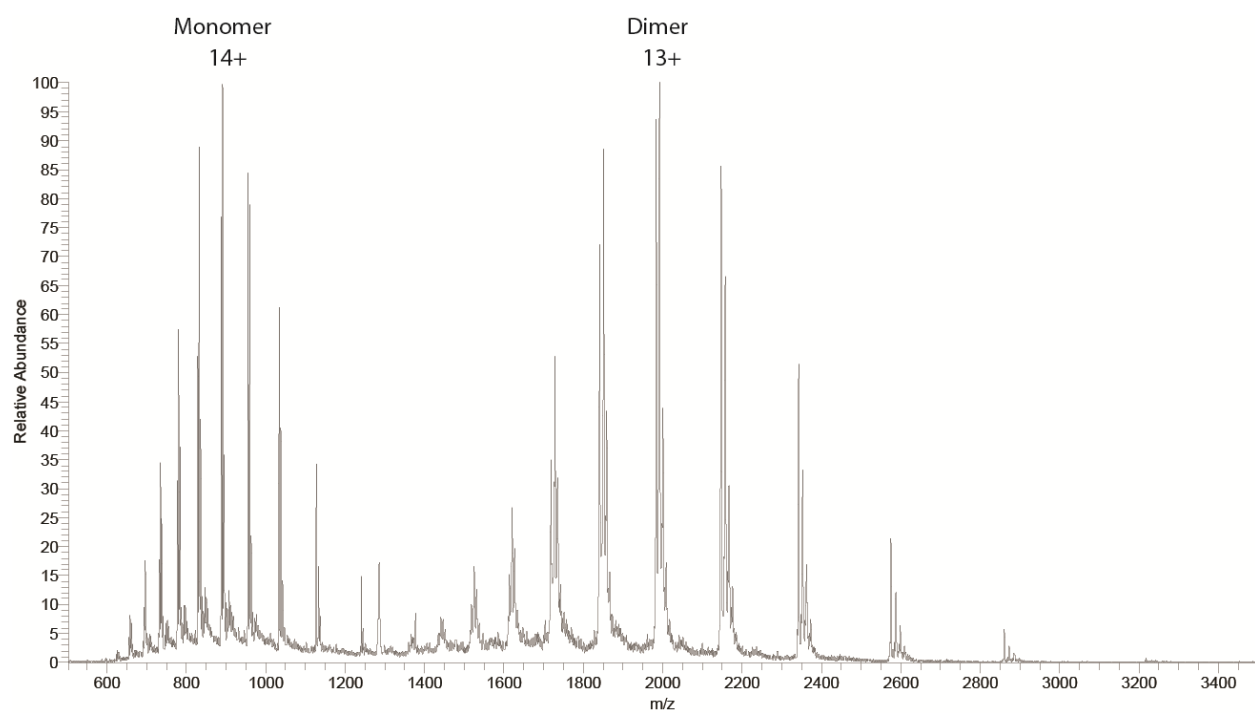

**Figure S1.** NanoESI mass spectrum of cytochrome *c* in water with 3% HD.

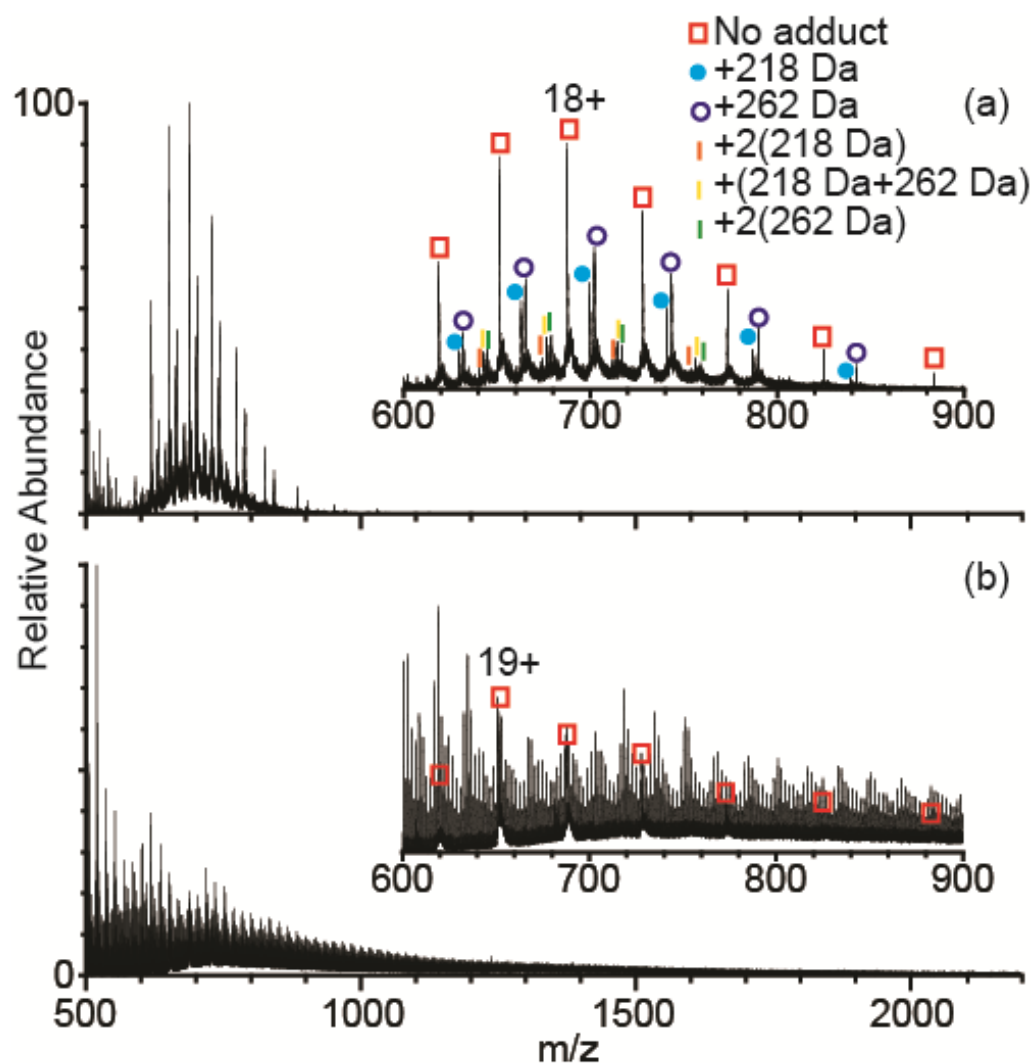

**Figure S2.** NanoESI mass spectra of cytochrome *c* in water with 2% HD (a) and 2% 2-thiophenone (b) acquired using a Waters Q-TOF mass spectrometer. Adducts to cytochrome *c* in (a) are likely due to impurities in the HD stock, and cluster ions in (b) are likely composed of varying numbers of 2-thiophenone molecules and salts present in either the 2-thiophenone or protein stock.
